# Supplementary material for: Abscopal Effect in Non-injected Tumors Achieved with Cytokine-Armed Oncolytic Adenovirus
Source: PubMed Central journal article supplement — Mol Ther Oncolytics. 2018 Nov 6;11:109–21. doi: 10.1016/j.omto.2018.10.005 (PMC6288321; doi:10.1016/j.omto.2018.10.005), 2018-11-06
Supplement: mmc1.pdf [file mmc1.pdf]

**OMTO, Volume 11**

## **Supplemental Information**

**Abscopal Effect in Non-injected Tumors**

**Achieved with Cytokine-Armed Oncolytic**

**Adenovirus**

**Riikka Havunen, João M. Santos, Suvi Sorsa, Tommi Rantaperö, Dave Lumen, Mikko Siurala, Anu J. Airaksinen, Victor Cervera-Carrascon, Siri Tähtinen, Anna Kanerva, and Akseli Hemminki**

Supplementary Materials:

Fig. S1

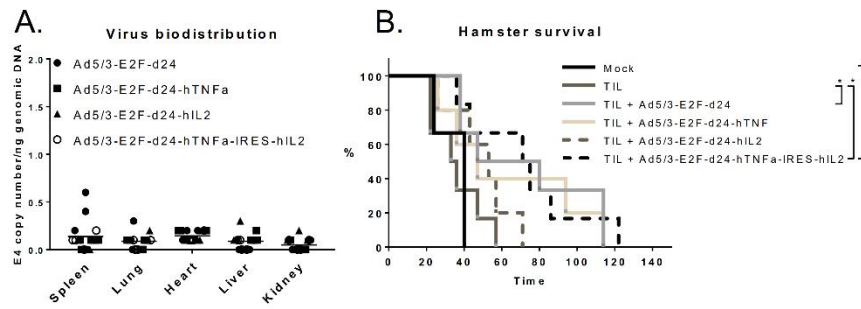

**Supplementary Figure S1. Viruses spread throughout the body and prolong hamster survival.** Small amounts of viral DNA were detected in different parts of the body on day 16 (A). The tumor progression of the hamsters treated with viruses on days 1, 8, 15, 22, and 29, and once with TILs was followed until the tumor size exceeded 2.0 cm or the tumors ulcerated (B). Log-rank test was performed to evaluate the statistical significance, \* $p < 0.05$ .

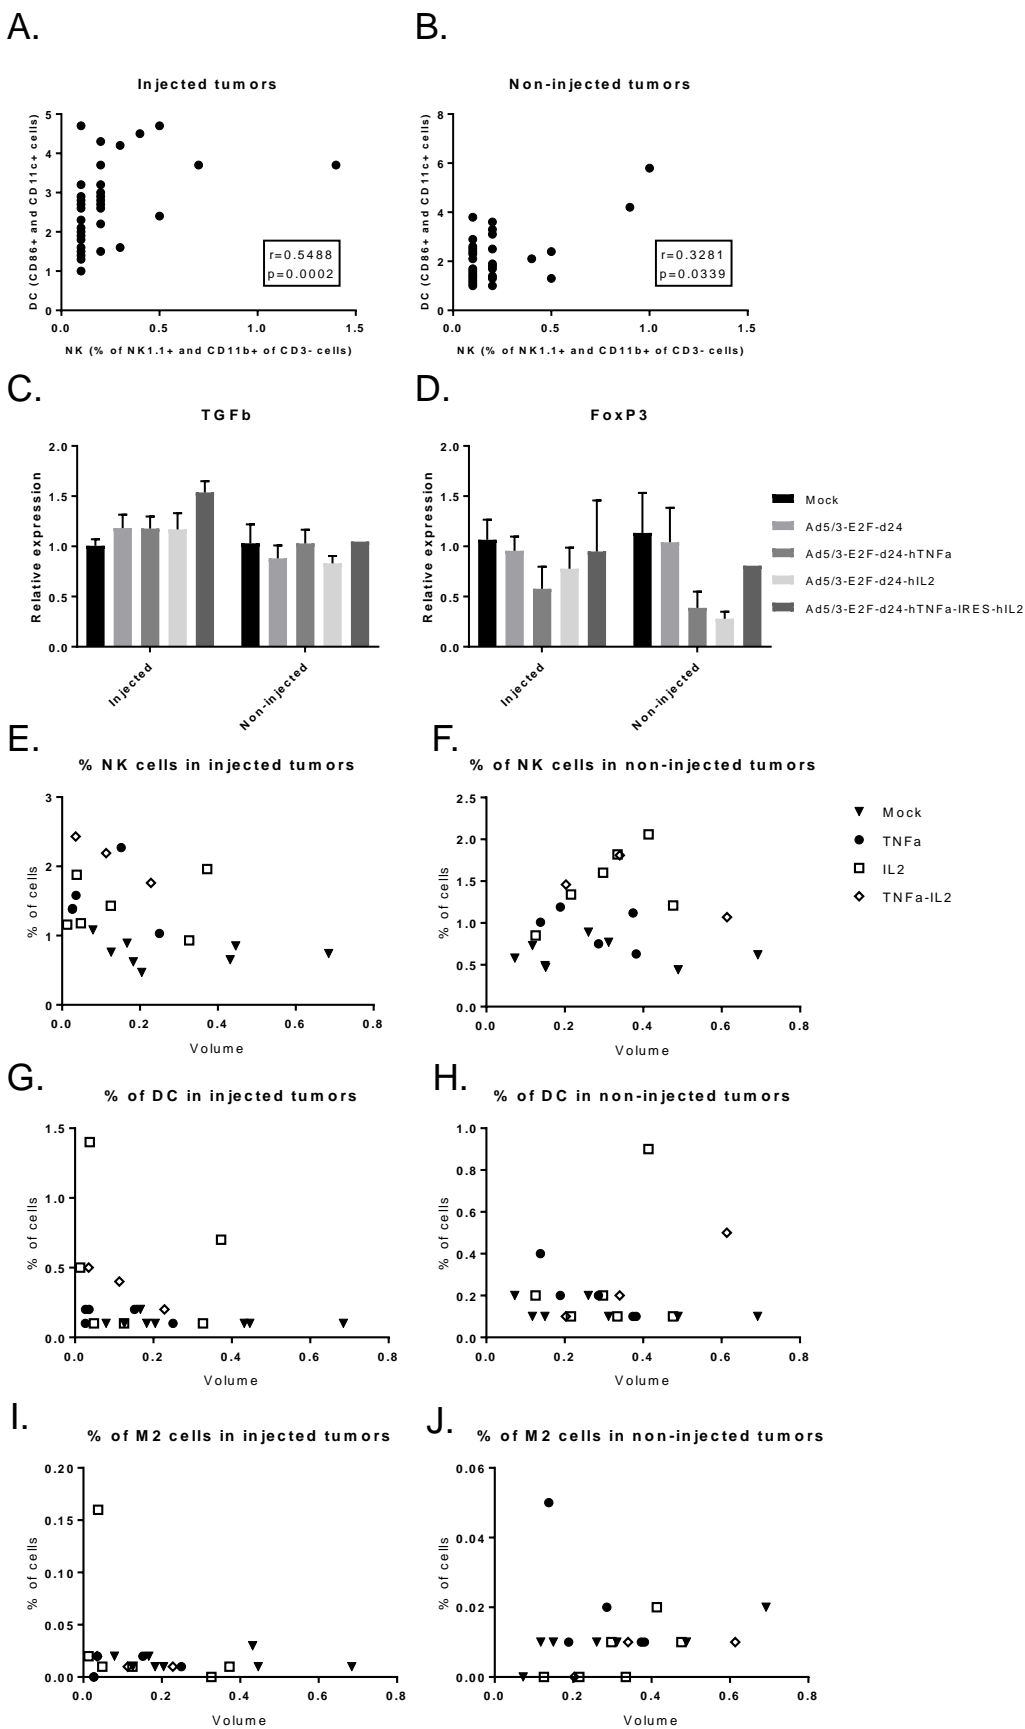

**Supplementary Figure S2.** The level of dendritic cells in the tumor positively correlates with the level of NK cells. The correlation was determined with Spearman's rank correlation equation (A, B). Relative gene expression levels of TGFb (C) and FoxP3 (D) in injected or non-injected tumors. Mean plus SEM is shown. Percentage of immune cells in tumors (NK cells (E, F), DCs (G, H) and M2 macrophages (I, J) in injected and non-injected tumors, respectively) did not correlate with tumor volumes.

Fig. S3

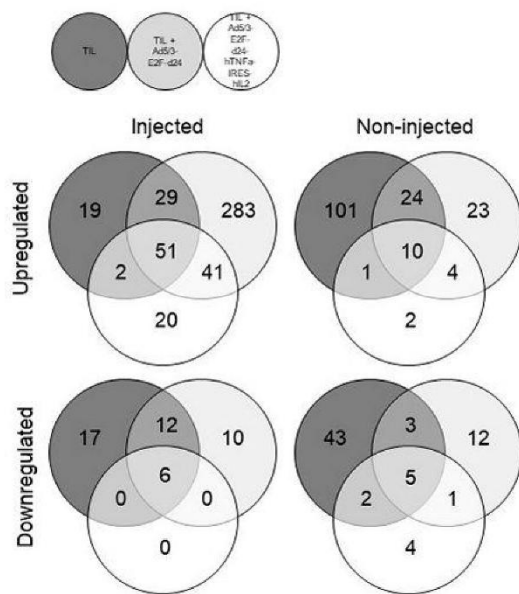

**Supplementary figure S3. Number of differentially expressed genes in tumors compared with corresponding mock tumors.** The number inside a restricted area describes the number of differentially expressed genes unique in a group or common between two or three groups.

Fig. S4

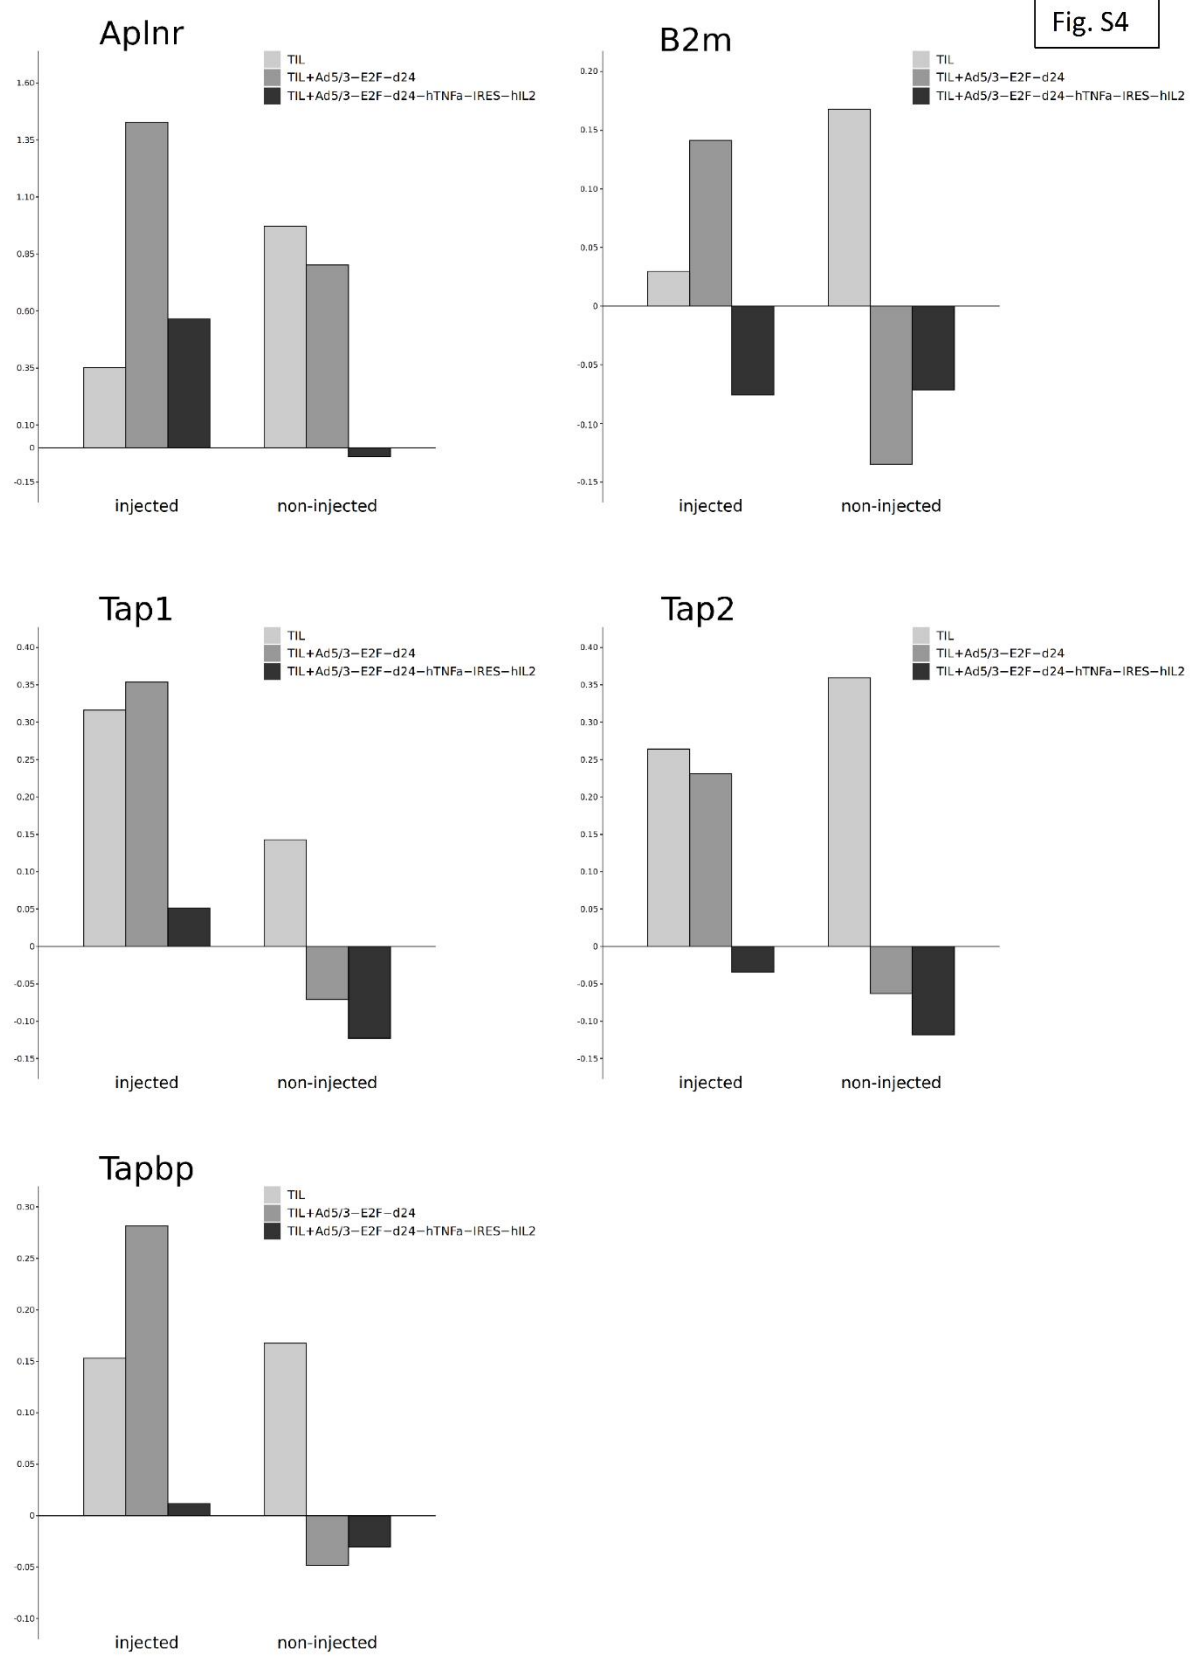

**Supplementary figure S4. Change in the expression of essential genes for immunotherapy.** Log2 fold-change of selected immunotherapy-related genes compared with the corresponding mock group.

Fig. S5

- TIL
- Ad5/3-E2F-d24 + TIL
- Ad5/3-E2F-d24-hTNFa-IRES-hIL2 + TIL

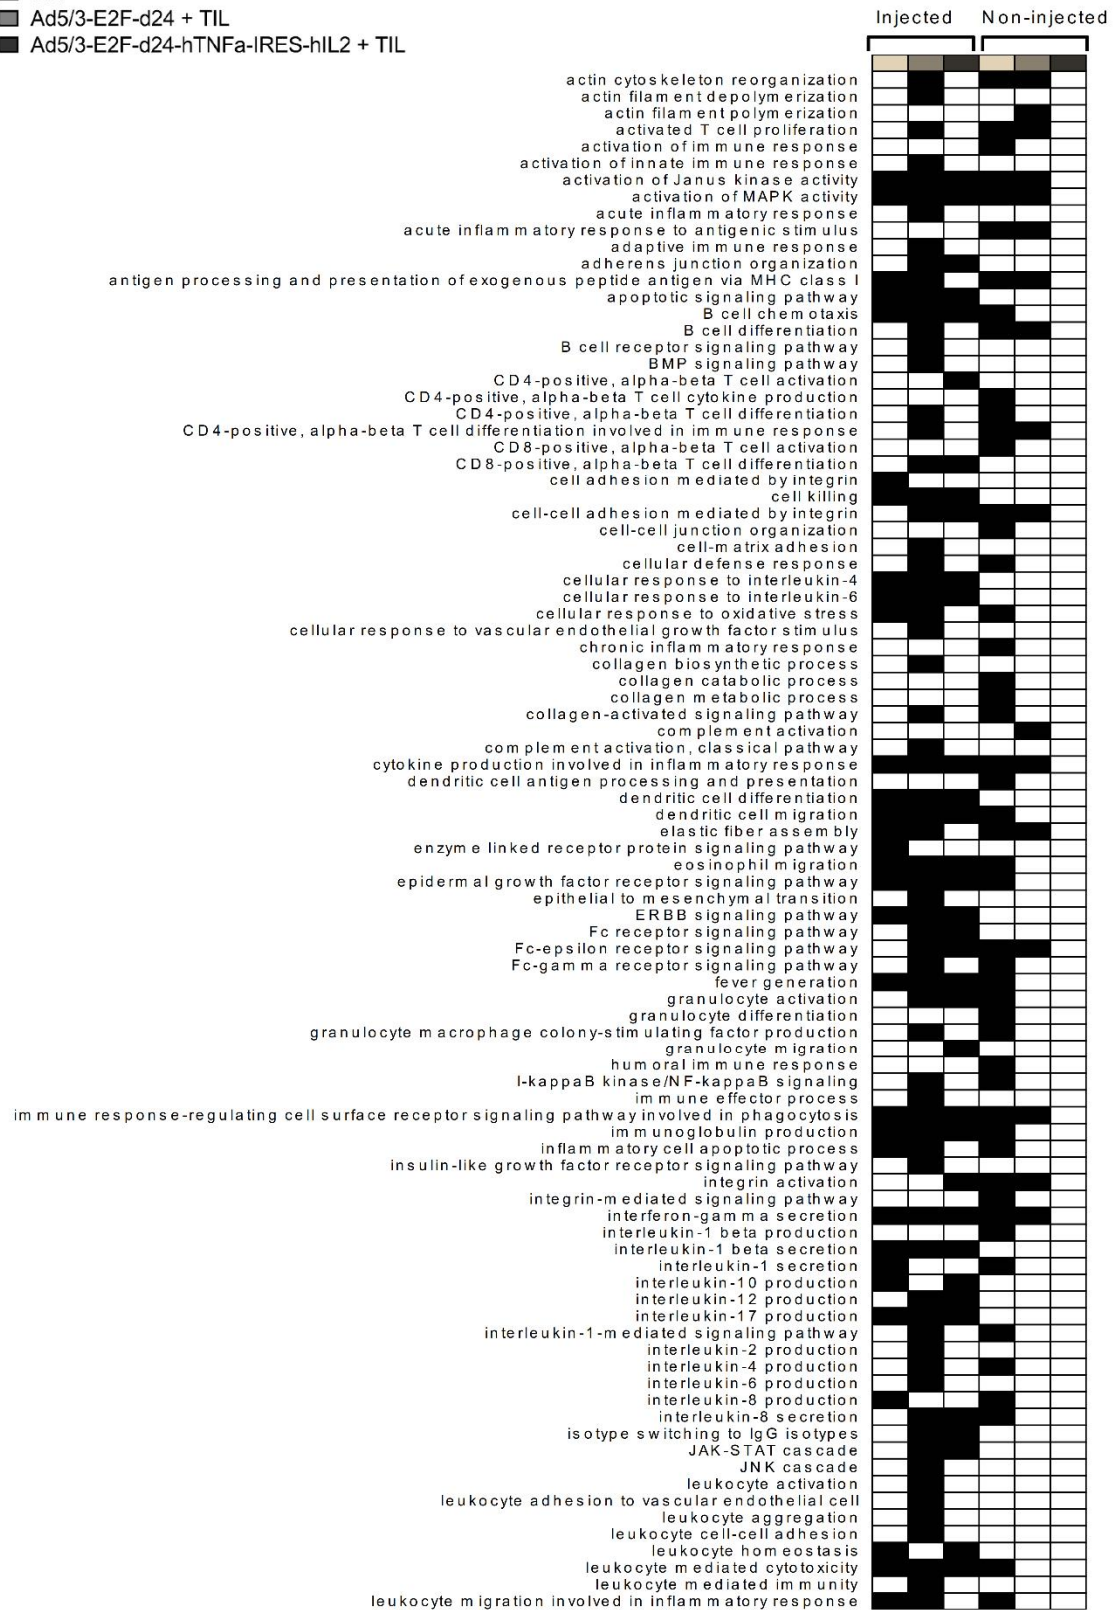









Fig. S6

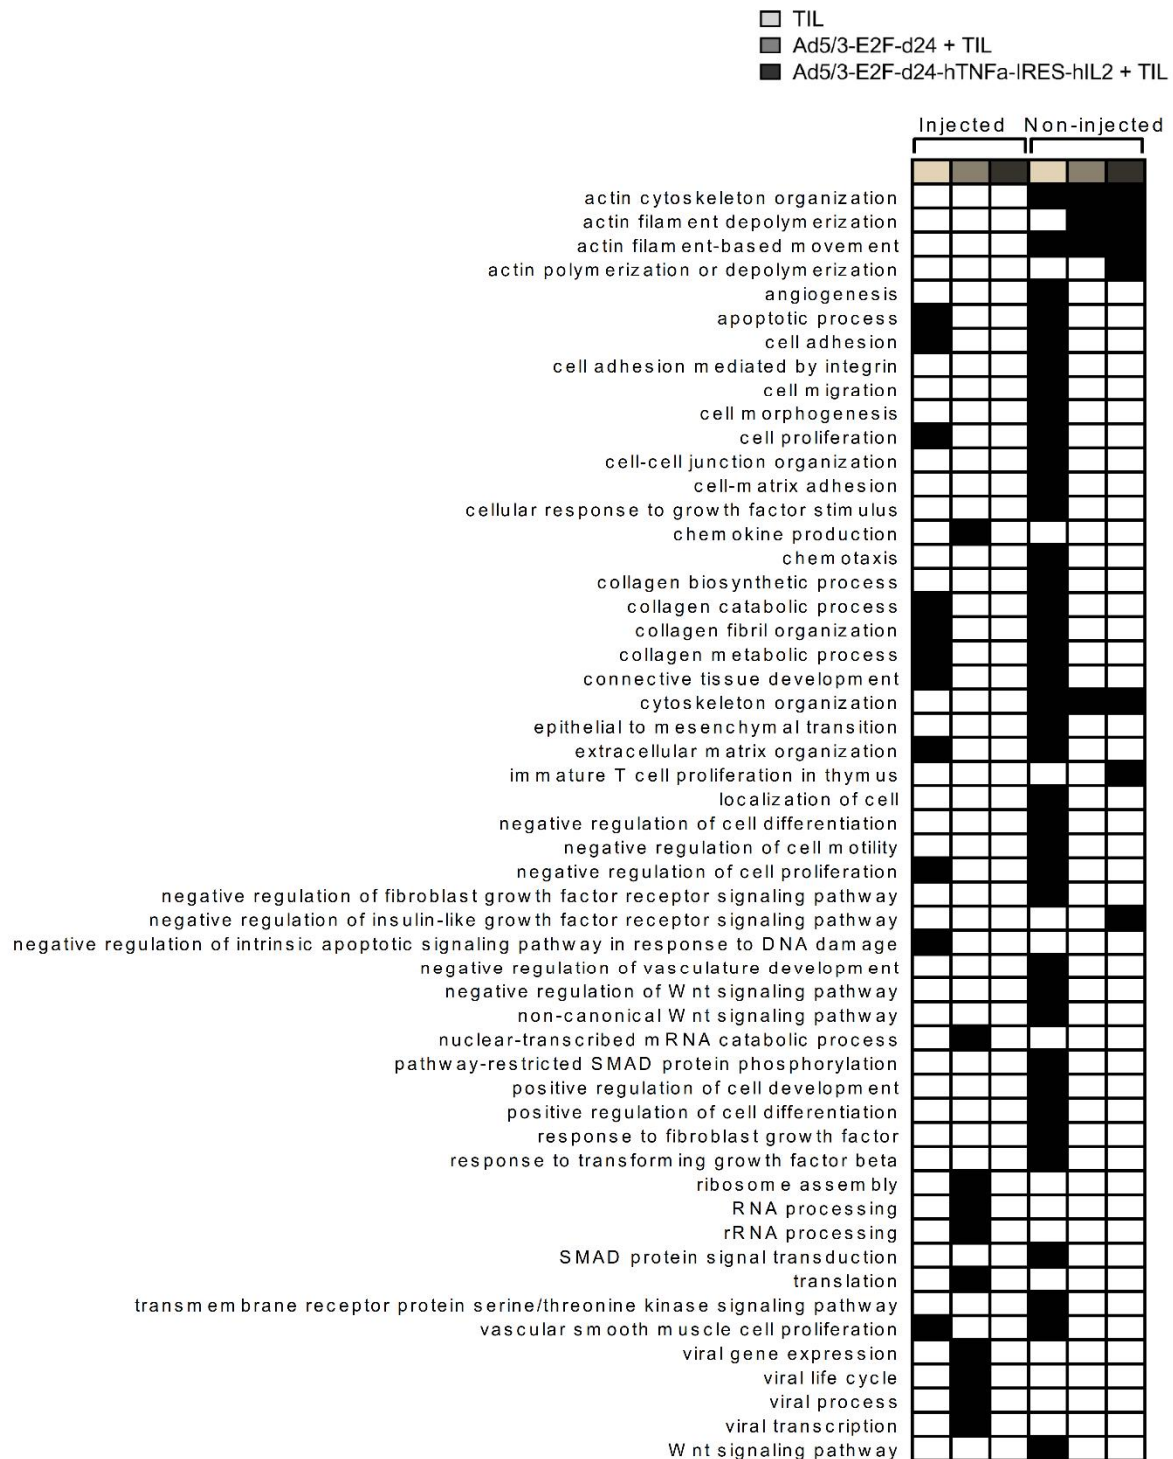

**Supplementary figure S6. Downregulated genes are related to various processes in cells.** Gene ontology analysis was performed to group the downregulated genes according to their functions. Black box indicates the treatment groups where the downregulation of the pathway was observed.

**Supplementary Table S1. Saline injection induces changes in immunologically relevant gene sets.** Gene ontology classification was performed against human genome for human orthologs. Most relevant gene groups are shown for both up- and downregulated genes.

| <b>UPREGULATED</b> |                                                           |            |                                                                                                    |
|--------------------|-----------------------------------------------------------|------------|----------------------------------------------------------------------------------------------------|
| <b>Geneset</b>     | <b>Description</b>                                        | <b>FDR</b> | <b>Genes</b>                                                                                       |
| <b>GO:0009617</b>  | response to bacterium                                     | 0.001884   | ADM; CSF3; HPGD; LCN2; S100A8; S100A9; CXCL5; SFTPD; TNF; PGLYRP1                                  |
| <b>GO:0006955</b>  | immune response                                           | 0.00336    | ADM; CSF3; CFD; LCN2; ENPP3; PIGR; PLSCR1; IL20RB; S100A8; S100A9; CXCL5; SFTPD; TNF; C3; PGLYRP1  |
| <b>GO:0051707</b>  | response to other organism                                | 0.00355    | ADM; CSF3; HPGD; LCN2; PLSCR1; S100A8; S100A9; CXCL5; SFTPD; TNF; PGLYRP1                          |
| <b>GO:0043207</b>  | response to external biotic stimulus                      | 0.00355    | ADM; CSF3; HPGD; LCN2; PLSCR1; S100A8; S100A9; CXCL5; SFTPD; TNF; PGLYRP1                          |
| <b>GO:0009607</b>  | response to biotic stimulus                               | 0.004028   | ADM; CSF3; HPGD; LCN2; PLSCR1; S100A8; S100A9; CXCL5; SFTPD; TNF; PGLYRP1                          |
| <b>GO:0042592</b>  | homeostatic process                                       | 0.004028   | ADM; CP; FGF12; GCK; HCAR2; LCN2; SLC26A4; PIGR; IL20RB; S100A8; S100A9; SFTPD; SLC9A3; TNF; NAPSA |
| <b>GO:0052547</b>  | regulation of peptidase activity                          | 0.004281   | WFDC2; PI16; FETUB; S100A8; S100A9; SFRP2; TNF; C3                                                 |
| <b>GO:0002682</b>  | regulation of immune system process                       | 0.00633    | CSF3; CFD; DPP4; HCAR2; PIGR; PLSCR1; IL20RB; CXCL5; SFTPD; BMP5; TNF; C3; PGLYRP1                 |
| <b>GO:0051050</b>  | positive regulation of transport                          | 0.006421   | CSF3; FGF12; GCK; EHD3; HCAR2; S100A8; S100A9; SFRP2; SFTPD; TNF; C3                               |
| <b>GO:0032496</b>  | response to lipopolysaccharide                            | 0.006421   | ADM; CSF3; HPGD; LCN2; S100A8; CXCL5; TNF                                                          |
| <b>GO:0002237</b>  | response to molecule of bacterial origin                  | 0.007698   | ADM; CSF3; HPGD; LCN2; S100A8; CXCL5; TNF                                                          |
| <b>GO:0042742</b>  | defense response to bacterium                             | 0.009877   | ADM; S100A8; S100A9; SFTPD; TNF; PGLYRP1                                                           |
| <b>GO:0002526</b>  | acute inflammatory response                               | 0.010866   | PLSCR1; IL20RB; S100A8; TNF; C3                                                                    |
| <b>GO:0002861</b>  | regulation of inflammatory response to antigenic stimulus | 0.010866   | IL20RB; TNF; C3                                                                                    |
| <b>GO:0006952</b>  | defense response                                          | 0.012188   | ADM; CFD; DPP4; LCN2; PLSCR1; IL20RB; S100A8; S100A9; CXCL5; SFTPD; TNF; C3; PGLYRP1               |
| <b>GO:0052548</b>  | regulation of endopeptidase activity                      | 0.013068   | WFDC2; FETUB; S100A8; S100A9; SFRP2; TNF; C3                                                       |
| <b>GO:0048878</b>  | chemical homeostasis                                      | 0.01554    | ADM; CP; FGF12; GCK; LCN2; SLC26A4; S100A8; S100A9; SFTPD; SLC9A3; NAPSA                           |
| <b>GO:0046916</b>  | cellular transition metal ion homeostasis                 | 0.024977   | CP; LCN2; S100A8; S100A9                                                                           |
| <b>GO:0050832</b>  | defense response to fungus                                | 0.029304   | ADM; S100A8; S100A9                                                                                |
| <b>GO:0050727</b>  | regulation of inflammatory response                       | 0.035014   | IL20RB; S100A8; S100A9; TNF; C3; PGLYRP1                                                           |
| <b>GO:0098542</b>  | defense response to other organism                        | 0.035375   | ADM; PLSCR1; S100A8; S100A9; SFTPD; TNF; PGLYRP1                                                   |
| <b>GO:0002437</b>  | inflammatory response to antigenic stimulus               | 0.048265   | IL20RB; TNF; C3                                                                                    |

|                   |                                              |               |                                                                                              |
|-------------------|----------------------------------------------|---------------|----------------------------------------------------------------------------------------------|
| <b>GO:0006954</b> | inflammatory response                        | 0.048265      | PLSCR1; IL20RB; S100A8; S100A9; CXCL5; TNF; C3; PGLYRP1                                      |
| <b>GO:0050729</b> | positive regulation of inflammatory response | 0.048265      | S100A8; S100A9; TNF; C3                                                                      |
| <b>GO:0055076</b> | transition metal ion homeostasis             | 0.048265      | CP; LCN2; S100A8; S100A9                                                                     |
| <b>GO:0009605</b> | response to external stimulus                | 0.048265      | ADM; CSF3; HPGD; LCN2; PLSCR1; IL20RB; S100A8; S100A9; CXCL5; SFRP2; SFTPD; TNF; C3; PGLYRP1 |
| <b>GO:0002883</b> | regulation of hypersensitivity               | 0.048265      | IL20RB; C3                                                                                   |
| <b>GO:0043129</b> | surfactant homeostasis                       | 0.048265      | SFTPD; NAPSA                                                                                 |
| <b>GO:0050766</b> | positive regulation of phagocytosis          | 0.048553<br>0 | SFTPD; TNF; C3                                                                               |

#### DOWNREGULATED

| <b>Geneset</b>    | <b>Description</b>                               | <b>FDR</b>    | <b>Genes</b>                                                                                                                                                                                                                                                                                                                |
|-------------------|--------------------------------------------------|---------------|-----------------------------------------------------------------------------------------------------------------------------------------------------------------------------------------------------------------------------------------------------------------------------------------------------------------------------|
| <b>GO:0030048</b> | actin filament-based movement                    | 0             | DES; MYBPC1; MYH3; MYH8; MYL1; MYL2; MYL3; NEB; ATP1A2; ACTA1; SCN5A; ACTC1; TMOD1; TNNC2; TNNC1; TNNI1; TNNT1; TNNT2; TNNT3; TPM2; TTN; CACNA2D1; TCAP; CAV3; ACTN2                                                                                                                                                        |
| <b>GO:0007010</b> | cytoskeleton organization                        | 1.02E-11      | KLHL41; CAP2; NES; CORO1A; LDB3; ADD2; XIRP2; CRYAB; XIRP1; DES; SYNPO2; FGD2; ANKRD1; PDLIM3; ANK1; KIT; MEF2C; LMOD2; MYH3; MYL2; NEB; MYOZ2; PFN2; PKP1; WNT4; LMOD3; PROX1; TRIM54; ACTA1; CCL11; CCL21; SPTB; ACTC1; TMOD1; TNNT2; TPM2; TTN; SYNPO2L; CSR3; OBSCN; CASQ1; CASQ2; MYPN; GPR65; TCAP; CAV3; ACTN2; NEXN |
| <b>GO:0007015</b> | actin filament organization                      | 6.42E-10      | CAP2; CORO1A; ADD2; SYNPO2; PDLIM3; LMOD2; PFN2; WNT4; LMOD3; PROX1; ACTA1; CCL11; CCL21; SPTB; ACTC1; TMOD1; TNNT2; TPM2; TTN; SYNPO2L; GPR65; TCAP; CAV3; ACTN2                                                                                                                                                           |
| <b>GO:0008015</b> | blood circulation                                | 3.00E-09      | DES; EPHX2; F5; HSPB7; HRC; CXCL10; AR; KCNJ11; MYL1; MYL2; MYL3; ATP1A2; RYR1; SCN5A; SLC8A1; ACTC1; TNNC1; TNNI1; TNNT2; TTN; CACNA1S; CACNA2D1; CACNG1; CSR3; CASQ1; CASQ2; TCAP; CAV3                                                                                                                                   |
| <b>GO:0051495</b> | positive regulation of cytoskeleton organization | 3.78E-05      | NES; CORO1A; SYNPO2; LMOD2; PFN2; WNT4; PROX1; CCL11; CCL21; SYNPO2L; GPR65; CAV3; ACTN2                                                                                                                                                                                                                                    |
| <b>GO:0030335</b> | positive regulation of cell migration            | 5.54E-04      | CORO1A; FLT4; DAPK2; HSPB1; CXCL10; ITGA4; KIT; PGF; PROX1; RELN; ACKR3; CCL11; CCL21; SLC8A1; THBS4; WNT7A; CXCL14                                                                                                                                                                                                         |
| <b>GO:0051494</b> | negative regulation of cytoskeleton organization | 8.31E-04      | CORO1A; ADD2; LMOD2; PFN2; LMOD3; TRIM54; SPTB; TMOD1; CAV3                                                                                                                                                                                                                                                                 |
| <b>GO:0008154</b> | actin polymerization or depolymerization         | 0.001091<br>6 | CAP2; CORO1A; ADD2; LMOD2; PFN2; LMOD3; CCL11; CCL21; SPTB; TMOD1; ACTN2                                                                                                                                                                                                                                                    |
| <b>GO:0090136</b> | epithelial cell-cell adhesion                    | 0.001426<br>3 | CYP1B1; KIT; NOV; THBS4                                                                                                                                                                                                                                                                                                     |
| <b>GO:0006887</b> | exocytosis                                       | 0.001890<br>9 | CPLX2; CORO1A; CTSW; F5; MMRN1; ANK1; KIT; TRIM72; PFN2; SERPINA1; RAB27A; TIMP3; TTN; ZAP70; ACTN2; SYTL3                                                                                                                                                                                                                  |

|                   |                                                          |               |                                                                                                                                                       |
|-------------------|----------------------------------------------------------|---------------|-------------------------------------------------------------------------------------------------------------------------------------------------------|
| <b>GO:0030837</b> | negative regulation of actin filament polymerization     | 0.002007<br>3 | ADD2; LMOD2; PFN2; LMOD3; SPTB; TMOD1                                                                                                                 |
| <b>GO:0030217</b> | T cell differentiation                                   | 0.002663<br>5 | IHH; KIT; LCK; WNT4; SATB1; SPN; ZAP70; EOMES; FZD8; CD3E; CD8A                                                                                       |
| <b>GO:0045321</b> | leukocyte activation                                     | 0.003304<br>7 | IKZF1; CPLX2; CORO1A; SH2D1B; IHH; ITGA4; KIT; LCK; MEF2C; WNT4; RAB27A; SATB1; CCL21; SPN; ZAP70; TNFAIP8L2; EOMES; FZD8; CD3E; CD8A; ITM2A; CD40    |
| <b>GO:0051693</b> | actin filament capping                                   | 0.003319<br>5 | ADD2; LMOD2; LMOD3; SPTB; TMOD1                                                                                                                       |
| <b>GO:0002521</b> | leukocyte differentiation                                | 0.006935<br>9 | IKZF1; IHH; ITGA4; KIT; LCK; MEF2C; WNT4; FAM20C; SATB1; SPN; ZAP70; EOMES; FZD8; CD3E; CD8A; ITM2A                                                   |
| <b>GO:0002551</b> | mast cell chemotaxis                                     | 0.007554<br>4 | KIT; PGF; CCL11                                                                                                                                       |
| <b>GO:0050900</b> | leukocyte migration                                      | 0.007652<br>7 | CORO1A; DAPK2; CXCL10; ITGA4; KIT; LCK; NOV; PGF; CCL11; CCL21; SPN; THBS4; ZAP70; CXCL14                                                             |
| <b>GO:0008284</b> | positive regulation of cell proliferation                | 0.008454<br>5 | NES; CORO1A; FLT4; IHH; CXCL10; AR; KIT; MEF2C; PGF; PROX1; CLEC11A; SCN5A; CCL11; ST8SIA1; SPN; TGM2; THBS4; WNT7A; ZAP70; CAV3; ALDH1A2; CD3E; CD40 |
| <b>GO:0007159</b> | leukocyte cell-cell adhesion                             | 0.009966<br>9 | CORO1A; IHH; ITGA4; KIT; LCK; WNT4; RAB27A; SATB1; CCL21; SPN; ZAP70; TNFAIP8L2; EOMES; FZD8; CD3E; CD8A                                              |
| <b>GO:0001568</b> | blood vessel development                                 | 0.010149<br>6 | CSPG4; CYP1B1; FLT4; HSPB1; CXCL10; MEF2C; NOV; PGF; WNT4; PROX1; ACKR3; CCL11; THBS4; C6; WNT7A; WT1; FZD8; ALDH1A2                                  |
| <b>GO:0042110</b> | T cell activation                                        | 0.012012<br>6 | CORO1A; IHH; KIT; LCK; WNT4; RAB27A; SATB1; CCL21; SPN; ZAP70; TNFAIP8L2; EOMES; FZD8; CD3E; CD8A                                                     |
| <b>GO:0043383</b> | negative T cell selection chemotaxis                     | 0.012118<br>8 | SPN; ZAP70; CD3E                                                                                                                                      |
| <b>GO:0006935</b> | positive regulation of chemotaxis                        | 0.013243<br>7 | CORO1A; DAPK2; HSPB1; CXCL10; KIT; MATN2; NOV; PGF; RELN; ACKR3; CCL11; CCL21; SPN; SPTB; THBS4; BOC; CXCL14                                          |
| <b>GO:0050921</b> | positive regulation of intracellular signal transduction | 0.020007<br>2 | DAPK2; HSPB1; CXCL10; PGF; CCL21; THBS4; CXCL14                                                                                                       |
| <b>GO:1902533</b> | myeloid leukocyte migration                              | 0.020882<br>5 | ABRA; CSPG4; CYP1B1; FGD2; FLT4; ANKRD1; LMCD1; CXCL10; AR; KIT; LCK; RELN; ACKR3; CCL11; CCL21; TGM2; WNT7A; ZAP70; FZD8; GPR65; CD3E; CD8A; CD40    |
| <b>GO:0097529</b> | insulin-like growth factor receptor signaling pathway    | 0.022119<br>0 | DAPK2; CXCL10; KIT; NOV; PGF; CCL11; CCL21; THBS4                                                                                                     |
| <b>GO:0048009</b> | MAPK cascade                                             | 0.027582<br>4 | GRB10; AR; TRIM72; CILP                                                                                                                               |
| <b>GO:0000165</b> | T cell migration                                         | 0.027703<br>2 | CRYAB; CSPG4; FGD2; FLT4; GFRA2; AR; KIT; MEF2C; ACKR3; NDRG2; CCL11; CCL21; SPTB; TIMP3; WNT7A; DUSP26; CAMK2A; CAMK2B; FZD8; CAV3; ACTN2; CD40      |
| <b>GO:0072678</b> | T cell migration                                         | 0.031876<br>2 | CXCL10; ITGA4; CCL21; ZAP70                                                                                                                           |

|                   |                           |               |                                                                                                                                                                                                                                                  |
|-------------------|---------------------------|---------------|--------------------------------------------------------------------------------------------------------------------------------------------------------------------------------------------------------------------------------------------------|
| <b>GO:0043299</b> | leukocyte degranulation   | 0.034746<br>2 | CPLX2; CORO1A; KIT; RAB27A; ZAP70                                                                                                                                                                                                                |
| <b>GO:0012501</b> | programmed cell death     | 0.036414<br>8 | NES; CORO1A; CRYAB; CYP1B1; EEF1A2; FGD2; FLT4; DAPK2; ANKRD2; ANKRD1; BIN1; HSPB1; IHH; IRF5; AR; KIT; LCK; MEF2C; PEG3; WNT4; ACKR3; SATB1; CCL21; SPN; ACTC1; TGM2; TIMP3; UCP2; WNT7A; WT1; CAMK2A; OBSCN; GPR65; ACTN2; ALDH1A2; CD3E; CD40 |
| <b>GO:0002520</b> | immune system development | 0.041954<br>7 | IKZF1; ADD2; GPR171; IHH; ITGA4; KIT; LCK; MB; MEF2C; WNT4; FAM20C; SATB1; SPN; ZAP70; EOMES; FZD8; CD3E; CD8A; ITM2A; CD40                                                                                                                      |
| <b>GO:0001525</b> | angiogenesis              | 0.043340<br>3 | CSPG4; CYP1B1; FLT4; HSPB1; CXCL10; NOV; PGF; ACKR3; CCL11; THBS4; C6; WNT7A; FZD8                                                                                                                                                               |
| <b>GO:0070661</b> | leukocyte proliferation   | 0.044425<br>0 | CORO1A; IHH; KIT; MEF2C; WNT4; SATB1; SPN; ZAP70; CD3E; CD40                                                                                                                                                                                     |
| <b>GO:0006955</b> | immune response           | 0.045732<br>8 | IL18BP; PRG4; CPLX2; CORO1A; SH2D1B; CTSW; FCGR3A; MYLPPF; CXCL10; IRF5; ITGA4; KIT; LCK; MEF2C; RAB27A; CCL11; CCL21; SPN; C6; C7; ZAP70; TNFAIP8L2; CAMK2A; CAMK2B; EOMES; GPR65; CD3E; CD8A; ITM2A; CXCL14; CD40                              |

**Supplementary Table S2. Injection with Ad5/3-E2F-d24-hTNFa-IRES-hIL2 induces a gene-expression profile unique for both injected and non-injected tumors.** Significantly ( $p < 0.05$ ) upregulated or downregulated genes found both in injected and non-injected tumors only in the group treated with Ad5/3-E2F-d24-hTNFa-IRES-hIL2.

| Gene                           | Name                                                             | Function                                                                                                   |
|--------------------------------|------------------------------------------------------------------|------------------------------------------------------------------------------------------------------------|
| <b>UPREGULATED</b>             |                                                                  |                                                                                                            |
| <i>Avil</i>                    | Advillin                                                         | Actin regulatory protein                                                                                   |
| <i>Cebpg</i>                   | CCAAT/enhancer-binding protein gamma                             | Suppresses senescence and inflammatory gene expression by heterodimerizing with C/EBP $\beta$              |
| <i>Csf3</i>                    | Colony Stimulating Factor 3                                      | Production, differentiation, and function of granulocytes                                                  |
| <i>Cxcl5</i><br>(LOC101835923) | Alveolar macrophage chemotactic factor                           | Chemokine induced by TNFa                                                                                  |
| <i>Gnb3</i>                    | Guanine nucleotide-binding protein G(I)/G(S)/G(T) subunit beta-3 | G protein, cell signaling                                                                                  |
| <i>Hapln1</i>                  | Hyaluronan and proteoglycan link protein 1                       | Stabilizes proteoglycan monomers                                                                           |
| <i>Ier3</i>                    | Radiation-inducible immediate-early gene IEX-1                   | Induced by cytokines and viral infection<br>Induces TNFa-stimulated apoptosis<br>Inhibits T cell apoptosis |
| LOC101834995                   | Ribosomal protein S6 kinase beta-1 pseudogene                    |                                                                                                            |
| <i>Lrmp</i>                    | Lymphoid-restricted membrane protein                             | Delivers peptides to major histocompatibility complex class I molecules                                    |
| <i>Pdk1</i>                    | Pyruvate dehydrogenase lipoamide kinase isozyme 1, mitochondrial | General metabolism                                                                                         |
| <i>Ptprm</i>                   | Receptor-type tyrosine-protein phosphatase mu                    | Regulates cell growth, differentiation, mitotic cycle, and oncogenic transformation                        |
| <i>Rev1</i>                    | DNA repair protein REV1                                          | Involved in DNA damage reparation                                                                          |
| <i>Rgs13</i>                   | Regulator of G-protein signaling 13                              | Regulates expansion and differentiation of naive B cells                                                   |
| <i>Rnase2</i>                  | Eosinophil-derived neurotoxin                                    | Non-secretory ribonuclease, chemotactic for dendritic cells                                                |
| <i>Sult1e1</i>                 | Estrogen sulfotransferase                                        | Regulates inflammatory response                                                                            |
| <i>Trpm5</i>                   | Transient receptor potential cation channel subfamily M member 5 | Ion channel                                                                                                |
| <b>DOWNREGULATED</b>           |                                                                  |                                                                                                            |
| <i>Bscl2</i>                   | Seipin                                                           | Involved in adipogenesis, lipid droplet homeostasis and cellular triglyceride lipolysis                    |
| <i>Camsap3</i>                 | Calmodulin-regulated spectrin-associated protein 3               | Microtubule minus-end binding protein                                                                      |
| <i>Card14</i>                  | Caspase recruitment domain-containing protein 14                 | Forms molecular scaffolds for the assembly of multiprotein complexes                                       |



|              |                                                             |                                                                                    |
|--------------|-------------------------------------------------------------|------------------------------------------------------------------------------------|
| Desi1        | Desumoylating Isopeptidase 1                                | Deconjugates substrates from SUMO proteins                                         |
| Jak3         | Janus kinase 3                                              | Expressed in T cells and NK cells, mediates IL2R signaling                         |
| Khsrp        | Far upstream element-binding protein 2                      | RNA-binding protein that stabilizes for example cytokine mRNAs                     |
| Lap3         | Leucine Aminopeptidase 3                                    | Functions in intracellular protein processing.                                     |
| LOC101824821 | Guanylate-binding protein 2-like                            |                                                                                    |
| LOC101825087 | Guanylate-binding protein 4-like                            |                                                                                    |
| LOC101826062 | H-2 class I histocompatibility antigen, alpha chain-like    |                                                                                    |
| LOC101828355 | H-2 class II histocompatibility antigen, E-U alpha chain    | Antigen presentation                                                               |
| LOC101834191 | Interferon-inducible GTPase 1-like                          |                                                                                    |
| LOC101834868 | Rano class II histocompatibility antigen, A beta chain-like |                                                                                    |
| LOC101835956 | Chromosome unknown C19orf66 homolog                         |                                                                                    |
| LOC101837226 | Immunity-related GTPase family M protein 1-like             |                                                                                    |
| LOC101838705 | Chromosome unknown C16orf92 homolog                         |                                                                                    |
| LOC101844521 | Class II histocompatibility antigen, M beta 1 chain         | Antigen presentation                                                               |
| LOC101844787 | Class II histocompatibility antigen, M alpha chain          | Antigen presentation                                                               |
| LOC106022816 | Uncharacterized                                             |                                                                                    |
| Rpl7l1       | Ribosomal protein L7 like 1                                 | mRNA translation                                                                   |
| Smg5         | SMG5, Nonsense Mediated MRNA Decay Factor                   | Functions in mRNA degradation                                                      |
| Uhrf1        | Ubiquitin-like, containing PHD and RING finger domains, 1   | Functions in p53-dependent DNA damage checkpoint                                   |
| Wars         | Tryptophanyl-tRNA synthetase, cytoplasmic                   | Catalyzes the aminoacylation of tRNA with tryptophan and is induced by interferons |
